# Supplementary material for: Protective Effects and Mechanisms of Vaccarin on Vascular Endothelial Dysfunction in Diabetic Angiopathy
Source: PubMed Central journal article supplement (PMC6769517; doi:10.3390/ijms20184587), 2019-09-17
Supplement: ijms-20-04587-s001.pdf [file ijms-20-04587-s001.pdf]

## Supplementary material

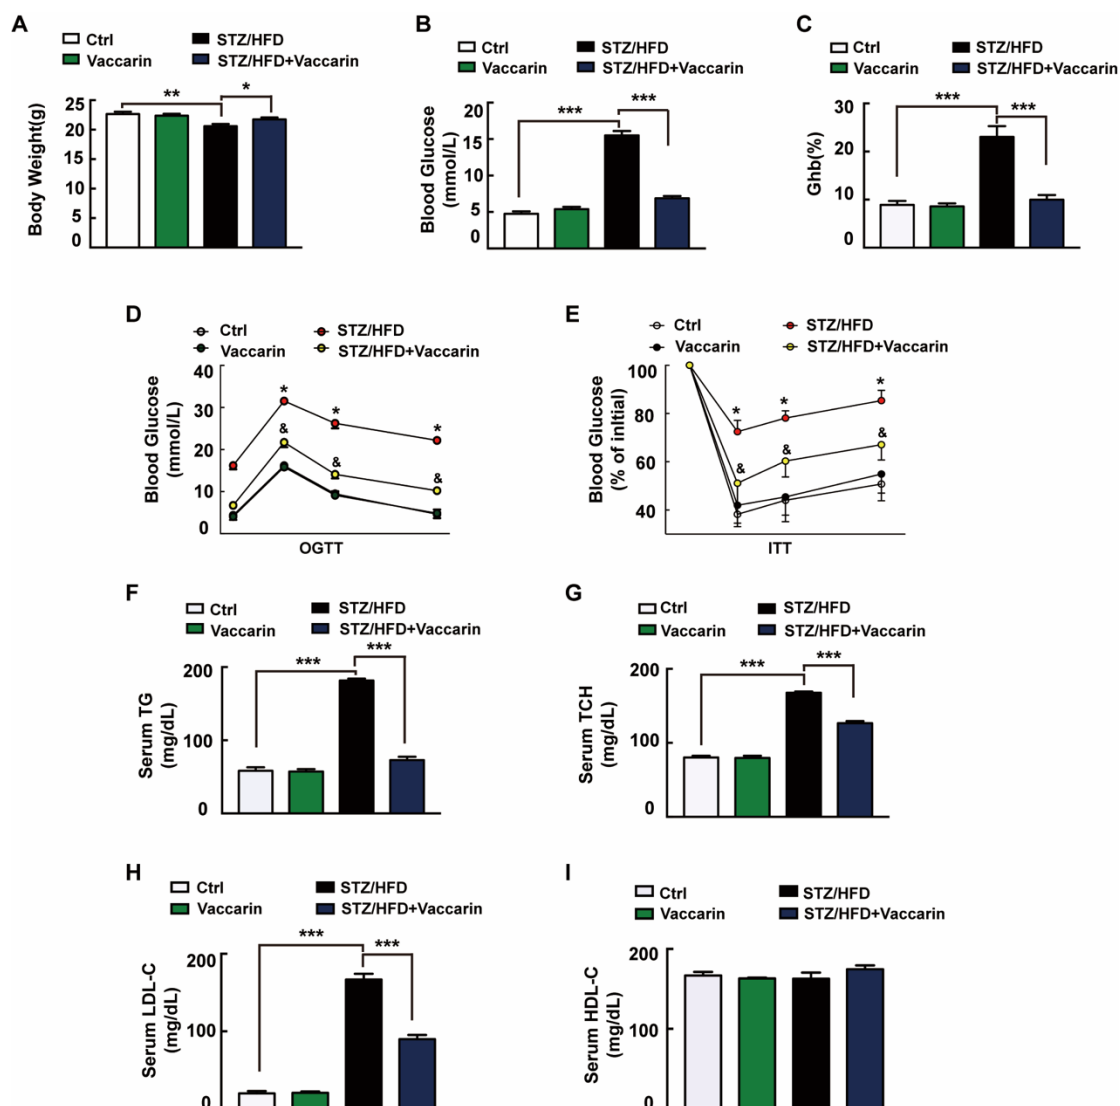

**Fig. S1 VAC alleviated glucose/lipid metabolic disorders and insulin resistance in STZ/HFD mice**

(A) Body weight, (B) blood glucose and (C) serum glycosylated hemoglobin test of STZ/HFD mice STZ/HFD; (D) Oral glucose tolerance test (OGTT) in the 11<sup>th</sup> week of experiments; (E) Insulin tolerance test (ITT); (F-I) Serum triglyceride (TG), Serum total cholesterol (TCH), Serum low density lipoprotein cholesterol (LDL-C) levels, Serum high density lipoprotein cholesterol (HDL-C) levels of T2DM mice. Values are mean  $\pm$  SEM, \* $p$  < 0.05, \*\* $p$  < 0.01, \*\*\* $p$  < 0.001, n=7 for each group.
